# Supplementary material for: A Common KIF6 Polymorphism Increases Vulnerability to Low-Density Lipoprotein Cholesterol: Two Meta-Analyses and a Meta-Regression Analysis
Source: PubMed Central journal article supplement (PMC3244415; doi:10.1371/journal.pone.0028834), 2011-12-21
Supplement: pone.0028834.s001.pdf [file pone.0028834.s001.pdf]

**Table S1:** Studies included in the meta-analysis of the KIF6 719Arg allele and the risk of cardiovascular disease

| Study                                      | Definition of “case” status                                                            | Number of Participants | Number of CVD Events (cases) |
|--------------------------------------------|----------------------------------------------------------------------------------------|------------------------|------------------------------|
| ADVANCE                                    | Acute MI                                                                               | 586                    | 275                          |
| AMI Gene Study                             | Acute MI                                                                               | 1,914                  | 793                          |
| CATHGEN                                    | MI                                                                                     | 2,028                  | 1,298                        |
| deCODE                                     | MI or coronary revascularization                                                       | 29,265                 | 4,313                        |
| FINRISK                                    | MI                                                                                     | 339                    | 167                          |
| GerMIFS I                                  | MI                                                                                     | 2,365                  | 722                          |
| GerMIFS II                                 | MI                                                                                     | 2,403                  | 1,126                        |
| HARPS                                      | MI                                                                                     | 1,064                  | 505                          |
| INTERHEART                                 | MI                                                                                     | 1,648                  | 789                          |
| MDS                                        | MI                                                                                     | 185                    | 86                           |
| MedStar                                    | coronary artery $\geq$ 50% stenosis                                                    | 1,322                  | 875                          |
| MGH PCAD                                   | MI                                                                                     | 464                    | 204                          |
| MAHI                                       | History of acute coronary syndrome                                                     | 1,444                  | 807                          |
| Penn-CATH                                  | coronary artery $\geq$ 50% stenosis                                                    | 1,401                  | 933                          |
| REGICOR                                    | MI                                                                                     | 629                    | 312                          |
| VHS                                        | coronary artery $\geq$ 50% stenosis                                                    | 1,489                  | 1,106                        |
| WTCCC                                      | MI or CAD                                                                              | 4,855                  | 1,922                        |
| Ottawa Heart Study                         | coronary artery $\geq$ 50% stenosis                                                    | 2,995                  | 1,540                        |
| CARE (placebo arm)                         | MI                                                                                     | 1,333                  | 162                          |
| CARE (statin arm)                          | MI                                                                                     | 1,364                  | 128                          |
| WOSCOPS (placebo arm)                      | CHD death or MI                                                                        | 795                    | 276                          |
| WOSCOPS (statin arm)                       | CHD death or MI                                                                        | 732                    | 189                          |
| PROVE-IT TIMI 22 (less intense statin arm) | Death, MI, arterial revascularization, or hospitalization for ACS                      | 907                    | 233                          |
| PROVE-IT TIMI 22 (more intense statin arm) | Death, MI, arterial revascularization, or hospitalization for ACS                      | 908                    | 177                          |
| PROSPER (placebo arm)                      | CHD death, MI, coronary revascularization                                              | 2,882                  | 379                          |
| PROSPER (statin arm)                       | CHD death, MI, coronary revascularization                                              | 2,870                  | 315                          |
| HPS (placebo arm)                          | CHD death, MI, stroke, arterial revascularization                                      | 9,181                  | 2,335                        |
| HPS (statin arm)                           | CHD death, MI, stroke, arterial revascularization                                      | 9,167                  | 1,850                        |
| JUPITER (placebo arm)                      | CHD death, MI, stroke, arterial revascularization, hospitalization for unstable angina | 2,311                  | 207                          |
| JUPITER (statin arm)                       | CHD death, MI, stroke, arterial revascularization, hospitalization for unstable angina | 2,288                  | 174                          |
| TNT (less intense statin arm)              | CHD death, MI, stroke, resuscitated cardiac arrest                                     | 3,305                  | 349                          |
| TNT (more intense statin arm)              | CHD death, MI, stroke, resuscitated cardiac arrest                                     | 3,236                  | 299                          |
| IDEAL (less intense statin arm)            | CHD death, MI, resuscitated cardiac arrest                                             | 4,377                  | 146                          |
| IDEAL (more intense statin arm)            | CHD death, MI, resuscitated cardiac arrest                                             | 4,404                  | 88                           |
| ARIC                                       | CHD death, MI, coronary revascularization                                              | 9,541                  | 1,000                        |
| CHS                                        | MI                                                                                     | 3,651                  | 395                          |
| WHS                                        | CHD death, MI, stroke, coronary revascularization                                      | 25,283                 | 990                          |
| <b>TOTAL</b>                               |                                                                                        | <b>144,931</b>         | <b>27,465</b>                |
