# Supplementary material for: A Common KIF6 Polymorphism Increases Vulnerability to Low-Density Lipoprotein Cholesterol: Two Meta-Analyses and a Meta-Regression Analysis
Source: PLoS One. 2011 Dec 21;6(12):e28834. doi: 10.1371/journal.pone.0028834 (PMC3244415; doi:10.1371/journal.pone.0028834)
Supplement: Table S2 — A description of the baseline characteristics of the randomized trials included in the meta-analysis of the clinical benefit of statin therapy stratified by KIF6 carrier status. The Difference in average LDL (mmol/L) is the difference between either treatment allocation arm. Study acronyms are defined in Table S1. (PDF) [file pone.0028834.s002.pdf]

**Table S2:** Baseline characteristics of studies included in the meta-analysis of the clinical benefit of statin therapy stratified by KIF6 carrier status

| Study           | Genetic Sub-Study Sample Size | Number of CVD Events | Treatment Comparison                        | Primary Outcome                                                                        | Median Follow-up (y) | <sup>1</sup> Difference in average LDL (mmol/L) |
|-----------------|-------------------------------|----------------------|---------------------------------------------|----------------------------------------------------------------------------------------|----------------------|-------------------------------------------------|
| CARE            | 2,697                         | 290                  | Statin vs. placebo                          | CHD death or MI                                                                        | 5.0                  | -0.98                                           |
| WOSCOPS         | 1,227                         | 465                  | Statin vs. placebo                          | CHD death or MI                                                                        | 4.8                  | -1.16                                           |
| PROVE-IT TIMI22 | 1,815                         | 410                  | More intense statin vs. less intense statin | Death, MI, arterial revascularization, or hospitalization for ACS                      | 2.1                  | -0.85                                           |
| PROSPER         | 5,752                         | 694                  | Statin vs. placebo                          | CHD death, MI, coronary revascularization                                              | 3.3                  | -1.04                                           |
| HPS             | 18,348                        | 4,185                | Statin vs. placebo                          | CHD death, MI, stroke, arterial revascularization                                      | 5.4                  | -1.00                                           |
| JUPITER         | 4,599                         | 381                  | Statin vs. placebo                          | CHD death, MI, stroke, arterial revascularization, hospitalization for unstable angina | 2.0                  | -1.09                                           |
| TNT             | 6,541                         | 648                  | More intense statin vs. less intense statin | CHD death, MI, stroke, resuscitated cardiac arrest                                     | 5.0                  | -0.62                                           |
| IDEAL           | 8,781                         | 234                  | More intense statin vs. less intense statin | CHD death, MI, resuscitated cardiac arrest                                             | 4.8                  | -0.59                                           |
| <b>TOTAL</b>    | <b>50,060</b>                 | <b>7,307</b>         |                                             |                                                                                        |                      |                                                 |

<sup>1</sup>Difference in average LDL (mmol/L) between either treatment allocation arm. Study acronyms are defined in Table S1.

Abbreviations: CHD: Coronary heart disease; MI: myocardial infarction; ACS: acute coronary syndrome.
