# Supplementary material for: A Common KIF6 Polymorphism Increases Vulnerability to Low-Density Lipoprotein Cholesterol: Two Meta-Analyses and a Meta-Regression Analysis
Source: PLoS One. 2011 Dec 21;6(12):e28834. doi: 10.1371/journal.pone.0028834 (PMC3244415; doi:10.1371/journal.pone.0028834)
Supplement: Text S1 — Equivalent measures of effect modification. (PDF) [file pone.0028834.s003.pdf]

## SUPPORTING INFORMATION

### **A Common KIF6 Polymorphism Increases Vulnerability to Low-Density Lipoprotein Cholesterol: Two Meta-Analyses and a Meta-Regression Analysis**

Brian A. Ference, M.D., M.Phil., M.Sc., Wonsuk Yoo, Ph.D., John M. Flack, M.D., M.P.H., Michael Clarke, D.Phil.

#### **Text S1: Equivalent Measures of Effect Modification**

For simplicity and clarity of presentation, the following refers to the effect modification between two dichotomous exposure variables, A and B, and the risk of a dichotomous outcome (DIS). Extension to continuous variables is straightforward.

##### *A) Measuring Effect Modification in a Generalized Linear Model*

For the following generalized linear model (logistic regression model) containing an interaction term:

$$\text{Ln}(\text{Odds}_{\text{DIS}}) = \text{constant} + \beta_1(A) + \beta_2(B) + \beta_3(A*B)$$

The interpretation of each term in the model is straightforward:

- $e^{\beta_1} = \text{OR (A-DIS)}_{B=0}$ ; is the Odds Ratio (OR) measuring the association between exposure A and the risk of disease (DIS), among persons not exposed to B (B=0)
- $e^{\beta_2} = \text{OR (B-DIS)}_{A=0}$ ; is the OR measuring the association between exposure B and the risk of disease, among persons not exposed to A (A=0)
- $e^{\beta_3} = \text{OR (A-B interaction)}$ ; is the OR for the interaction, or effect modification, between exposures A and B

To obtain the OR for the association between exposure A and the risk of disease among persons exposed to B ( $OR_{(A-DIS) B=1}$ ), the OR for the association between exposure A and the risk of disease among persons not exposed to B ( $OR_{(A-DIS) B=0}$ ) is multiplied by the interaction OR:

$$OR_{(A-DIS) B=1} = OR_{(A-DIS) B=0} \times OR_{(A-B \text{ interaction})}$$

With re-arrangement:

$$[1] \quad OR_{(A-B \text{ interaction})} = \frac{OR_{(A-DIS) B=1}}{OR_{(A-DIS) B=0}}$$

The interaction OR is thus the ratio of the OR's for the association between exposure A and the risk of disease among persons exposed to B and not exposed to B, respectively.

Similarly, to obtain the OR for the association between exposure B and the risk of disease among persons exposed to A ( $OR_{(B-DIS) A=1}$ ), the OR for the association between exposure B and the risk of disease among persons not exposed to A ( $OR_{(B-DIS) A=0}$ ) is multiplied by the interaction OR:

$$OR_{(B-DIS) A=1} = OR_{(B-DIS) A=0} \times OR_{(A-B \text{ interaction})}$$

With re-arrangement:

$$[2] \quad OR_{(A-B \text{ interaction})} = \frac{OR_{(A-DIS) B=1}}{OR_{(A-DIS) B=0}}$$

The interaction OR is thus also the ratio of the OR's for the association between exposure B and the risk of disease among persons exposed to A and not exposed to A, respectively.

Therefore, in a generalized linear model, a single interaction term defines the effect modification between any two exposure variables. As a result, the effect modification of exposure B on the association between exposure A and the risk of disease is exactly

equal to the effect modification of exposure A on the association between exposure B and the risk of disease, because these two estimates of effect modification are defined by the same interaction term as shown below:

$$[3] \quad \frac{OR_{(A-DIS) B=1}}{OR_{(A-DIS) B=0}} = OR_{(A-B \text{ interaction})} = \frac{OR_{(B-DIS) A=1}}{OR_{(B-DIS) A=0}}$$

### *B) Measuring Effect Modification in a Meta-Regression Equation*

The regression term in a meta-regression equation is also a measure of effect modification, and it is equivalent to an interaction term in a generalized linear model.

The following meta-regression equation estimates the effect modification of exposure B on the association between exposure A and the risk of disease (using study level values for the included variables):

$$\ln(OR_{(A-DIS)}) = \text{constant} + \beta_1(B)$$

When B=0, that is in studies conducted among persons not exposed to B:

$$\ln(OR_{(A-DIS) B=0}) = \text{constant} + \beta_1 * (0), \text{ or}$$

$$\ln(OR_{(A-DIS) B=0}) = \text{constant}$$

Taking the inverse natural log of both sides

$$OR_{(A-DIS) B=0} = e^{\text{constant}}$$

Therefore, the inverse natural logarithm of the constant term in this meta-regression equation is the OR measuring the association between exposure A and the risk of disease, *among persons not exposed to B (B=0)*.

When B=1, that is in studies conducted among persons exposed to B:

$$\text{Ln}(\text{OR}_{(\text{A-DIS}) \text{ B}=1}) = \text{constant} + \beta_1^*(1), \text{ or}$$

$$\text{Ln}(\text{OR}_{(\text{A-DIS}) \text{ B}=1}) = \text{constant} + \beta_1$$

Taking the inverse natural log of both sides (and recalling that the inverse natural log of the constant term is the OR for the association between exposure A and the risk of disease when B=0),

$$\text{OR}_{(\text{A-DIS}) \text{ B}=1} = \text{OR}_{(\text{A-DIS}) \text{ B}=0} \times \text{OR}_{(\text{Effect Modification of B})}$$

Thus the OR for the association between exposure A and the risk of disease among persons exposed to B ( $\text{OR}_{(\text{A-DIS}) \text{ B}=1}$ ) is equal to the OR for the association between exposure A and the risk of disease among persons not exposed to B ( $\text{OR}_{(\text{A-DIS}) \text{ B}=0}$ ) multiplied by the OR for the meta-regression term estimating the effect modification of exposure B on the association between exposure A and the risk of disease.

With re-arrangement,

$$[4] \quad \text{OR}_{(\text{Effect Modification of B})} = \frac{\text{OR}_{(\text{A-DIS}) \text{ B}=1}}{\text{OR}_{(\text{A-DIS}) \text{ B}=0}}$$

Therefore, the inverse natural logarithm of the regression term in this meta-regression equation is the ratio of the OR's for the association between exposure A and the risk of disease among persons exposed to B and not exposed to B, respectively. This is exactly the same interpretation as for the interaction term in the logistic model evaluating the interaction between exposures A and B as shown in equation [1].

Combining equations [1] through [4], we see that:

$$[5] \quad \text{OR}_{(\text{Effect Modification of B})} = \frac{\text{OR}_{(\text{A-DIS}) \text{ B}=1}}{\text{OR}_{(\text{A-DIS}) \text{ B}=0}} = \text{OR}_{(\text{A-B interaction})}$$

Thus a regression term in a meta-regression equation and an interaction term in a generalized linear model are merely different methods of estimating the same effect modification between any two exposures, and these two measures of effect modification are conceptually and numerically equivalent.

### *C) Equivalent Measures Effect Modification*

We have shown that a single interaction term in a generalized linear model defines the effect modification between any two exposure variables, and as a result the estimate of the effect modification of exposure B on the association between exposure A and the risk of disease is exactly equal to the estimate of the effect modification of exposure A on the association between exposure B and the risk of disease, as shown in equation [3]. We have also shown that a regression term in a meta-regression equation and an interaction term involving the same two variables in a generalized linear model are equivalent measures of effect modification, as shown in equation [5]. Therefore, like the interaction term in generalized linear model, the regression term in a meta-regression equation must also provide a simultaneous estimate of BOTH the effect modification of exposure B on the association between exposure A and the risk of disease AND an estimate of the effect modification of exposure A on the association between exposure B and the risk of disease, because these two estimates of effect modification are equal as shown below:

$$[6] \quad OR_{(\text{Effect Modification of B})} = \frac{OR_{(A-DIS) B=1}}{OR_{(A-DIS) B=0}} = OR_{(A-B \text{ interaction})} = \frac{OR_{(B-DIS) A=1}}{OR_{(B-DIS) A=0}}$$
